# Supplementary material for: Clearance of therapy‐induced senescent tumor cells by the senolytic ABT‐263 via interference with BCL‐XL–BAX interaction
Source: PubMed Central journal article supplement (PMC7530780; doi:10.1002/1878-0261.12761), 2020-08-05
Supplement: MOL2-14-2504-s004.pdf [file MOL2-14-2504-s004.pdf]

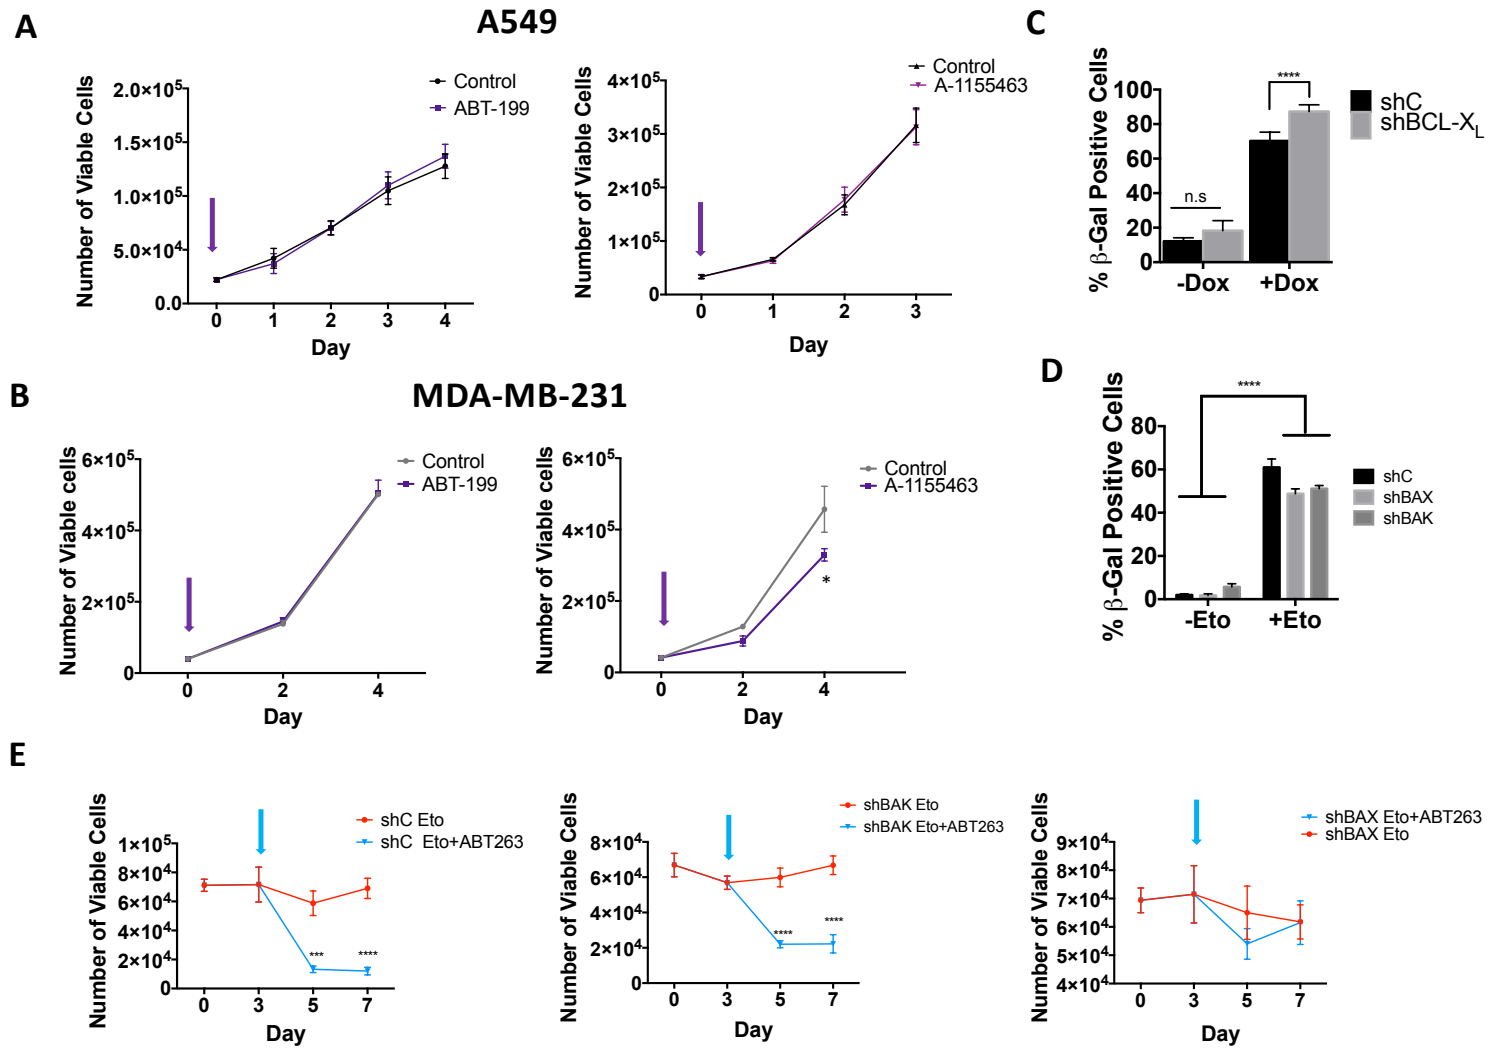

**Figure. S4. ABT-199 and A-1155463 have no effect on control cells and ABT-263 induces apoptosis by disrupting BCL-XL's interaction with BAX. (A and B)** Viable cell number for A549 cells (A) and MDA-MB-231 cells (B) treated with 2  $\mu$ M ABT-199 and 2  $\mu$ M A-1155463. \*  $p \leq 0.05$  indicates statistical significance between Eto/Dox vs. Eto/Dox + ABT-199/A-1155463 as determined by two-way ANOVA with Tukey's post hoc test. All other time-points were found to be nonsignificant. **(C)** C12FDG flow cytometry for MDA-MB-231 shBCL-X<sub>L</sub> cells following exposure to Dox at peak senescence, Day 4. \*\*\*\*  $p \leq 0.0001$  indicates statistical significance between shC variants and shBCL-X<sub>L</sub> variants as determined by two-way ANOVA with Tukey's post hoc test. **(D)** C12FDG flow cytometry for A549 shC, shBAX, and shBAK cells following exposure to Eto. \*\*\*\*  $p \leq 0.0001$  indicates statistical significance between untreated and Eto-treated cells as determined by two-way ANOVA with Tukey's post hoc test. **(E)** Viable cell number for shC, shBAK, and shBAX cells following treatment with Eto and Eto + ABT-263. \*\*\*  $p \leq 0.001$ , \*\*\*\*  $p \leq 0.0001$  indicate statistical significance between Eto-treated and Eto+ABT-263 treated cells as determined by two-way ANOVA with Tukey's post hoc test. All graphs are mean  $\pm$  SEM from three independent experiments (n=3)
